# Supplementary material for: Please Don’t Compliment Me! Fear of Positive Evaluation and Emotion Regulation—Implications for Adolescents’ Social Anxiety
Source: MDPI journal article supplement (doi:10.3390/jcm11205979), 2022-10-11
Supplement: s1 [file s1]

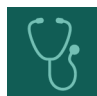

Supplementary

# Please Don't Compliment Me! Fear of Positive Evaluation and Emotion Regulation—Implications for Adolescents' Social Anxiety

Achilleas Tsarpalis-Fragkoulidis \*, Rahel Lea van Eickels and Martina Zemp

Department of Clinical and Health Psychology, University of Vienna, 1010, Vienna, Austria

\* Correspondence: achilleas.tsarpalis-fragkoulidis@univie.ac.at; Tel.: +43-676-3953360

**Table S1.** Direct Effects of the Structural Equation Model without Social Anxiety.

| Direct Effects     | <i>b</i>      | BC 95% CI        | $\beta$       | BC 95% CI        | <i>p</i> | <i>R</i> <sup>2</sup> |
|--------------------|---------------|------------------|---------------|------------------|----------|-----------------------|
| <i>Acceptance</i>  |               |                  |               |                  |          | .303                  |
| FPE                | <b>-0.141</b> | [-0.185, -0.093] | <b>-0.345</b> | [-0.453, -0.229] | <.001    |                       |
| FNE                | 0.060         | [-0.040, 0.156]  | 0.066         | [-0.044, 0.275]  | .234     |                       |
| Depression         | <b>-0.378</b> | [-0.508, -0.251] | <b>-0.318</b> | [-0.423, -0.209] | <.001    |                       |
| Gender (F vs. M)   | -0.105        | [-0.304, 0.088]  | -0.039        | [-0.112, 0.032]  | .291     |                       |
| Gender (F vs. O)   | -0.182        | [-0.450, 0.119]  | -0.046        | [-0.114, 0.029]  | .208     |                       |
| Age                | -0.033        | [-0.031, 0.098]  | 0.039         | [-0.038, 0.116]  | .316     |                       |
| <i>Suppression</i> |               |                  |               |                  |          | .335                  |
| FPE                | -0.004        | [-0.051, 0.043]  | -0.010        | [-0.140, 0.117]  | .878     |                       |
| FNE                | 0.009         | [-0.083, 0.099]  | 0.011         | [-0.102, 0.122]  | .852     |                       |
| Acceptance         | <b>-0.452</b> | [-0.549, -0.356] | <b>-0.500</b> | [-0.597, 0.397]  | <.001    |                       |
| Depression         | <b>0.144</b>  | [0.024, 0.269]   | <b>0.137</b>  | [0.022, 0.247]   | .021     |                       |
| Gender (F vs. M)   | -0.083        | [-0.268, 0.110]  | -0.034        | [-0.111, 0.045]  | .387     |                       |
| Gender (F vs. O)   | 0.139         | [-0.126, 0.388]  | 0.039         | [-0.034, 0.108]  | .288     |                       |
| Age                | -0.020        | [-0.072, 0.032]  | -0.025        | [-0.094, 0.041]  | .470     |                       |
| <i>Rumination</i>  |               |                  |               |                  |          | .635                  |
| FPE                | 0.010         | [-0.024, 0.044]  | 0.029         | [-0.068, 0.125]  | .554     |                       |
| FNE                | <b>0.230</b>  | [0.165, 0.290]   | <b>0.298</b>  | [0.215, 0.376]   | <.001    |                       |
| Acceptance         | 0.034         | [-0.033, 0.104]  | 0.040         | [-0.039, 0.121]  | .328     |                       |
| Depression         | <b>0.608</b>  | [0.516, 0.691]   | <b>0.599</b>  | [0.516, 0.670]   | <.001    |                       |
| Gender (F vs. M)   | -0.050        | [-0.186, 0.075]  | -0.022        | [-0.082, 0.032]  | .454     |                       |
| Gender (F vs. O)   | 0.010         | [-0.202, 0.226]  | 0.003         | [-0.057, 0.065]  | .923     |                       |
| Age                | 0.036         | [-0.002, 0.076]  | 0.050         | [-0.003, 0.107]  | .079     |                       |

Notes. *b* = unstandardized coefficient,  $\beta$  = standardized coefficient, FPE = fear of positive evaluation, FNE = fear of negative evaluation, SUP = suppression, ACC = acceptance, RUM = rumination, DEP = depressive symptoms. Significant values are in bold.

**Table S2.** Indirect Effects of the Structural Equation Model without Social Anxiety.

| Total and Indirect Effects           | <i>b</i>     | BC 95% CI      | $\beta$      | BC 95% CI      | <i>p</i> |
|--------------------------------------|--------------|----------------|--------------|----------------|----------|
| <i>FPE</i> → <i>SUP</i>              |              |                |              |                |          |
| Total Effect                         | <b>0.060</b> | [0.014;0.106]  | <b>0.162</b> | [0.039;0.287]  | .010     |
| <i>FPE</i> → <i>ACC</i> → <i>SUP</i> | <b>0.064</b> | [0.040, 0.091] | <b>0.172</b> | [0.109;0.244]  | <.001    |
| <i>FNE</i> → <i>SUP</i>              |              |                |              |                |          |
| Total Effect                         | -0.018       | [-0.123;0.084] | -0.022       | [-0.151;0.104] | .728     |
| <i>FNE</i> → <i>ACC</i> → <i>SUP</i> | -0.027       | [-0.083;0.099] | -0.033       | [-0.090;0.021] | .238     |
| <i>FPE</i> → <i>RUM</i>              |              |                |              |                |          |
| Total Effect                         | 0.005        | [-0.026;0.036] | 0.015        | [-0.07;0.104]  | .736     |
| <i>FPE</i> → <i>ACC</i> → <i>RUM</i> | -0.005       | [-0.016;0.004] | -0.014       | [-0.045;0.012] | .340     |
| <i>FNE</i> → <i>RUM</i>              |              |                |              |                |          |
| Total Effect                         | <b>0.232</b> | [0.168;0.292]  | <b>0.301</b> | [0.217;0.379]  | <.001    |
| <i>FNE</i> → <i>ACC</i> → <i>RUM</i> | 0.002        | [-0.001;0.014] | -0.003       | [-0.002;0.018] | .525     |

Notes. *b* = unstandardized coefficient,  $\beta$  = standardized coefficient, FPE = fear of positive evaluation, FNE = fear of negative evaluation, SUP = suppression, ACC = acceptance, RUM = rumination, DEP = depressive symptoms. Significant values are in bold.

**Table S3.** Means, Standard Deviations, and Correlations of all Study Variables and COVID-19 Burden.

| Variable | M     | SD    | 1       | 2       | 3       | 4       | 5       | 6       | 7      |
|----------|-------|-------|---------|---------|---------|---------|---------|---------|--------|
| 1. SA    | 1.99  | 0.87  | -       |         |         |         |         |         |        |
| 2. FNE   | 2.73  | 0.92  | .664**  | -       |         |         |         |         |        |
| 3. FPE   | 3.98  | 2.08  | .698**  | .496**  | -       |         |         |         |        |
| 4. RUM   | 2.64  | 0.70  | .561**  | .571**  | .449**  | -       |         |         |        |
| 5. SUP   | 3.49  | 0.79  | .231**  | .192**  | .264**  | .254**  | -       |         |        |
| 6. ACC   | 3.21  | 0.88  | -.389** | -.250** | -.409** | -.298** | -.471** | -       |        |
| 7. DEP   | 1.53  | 0.71  | .611**  | .467**  | .475**  | .673**  | .322**  | -.404** |        |
| 8. COV   | 55.85 | 28.69 | .119**  | .155**  | .111**  | .247**  | .034    | -0.91*  | .202** |

Notes.  $N = 647$ . \* $p < .05$ . \*\* $p < .01$ ; SA = social anxiety, FNE = fear of negative evaluation, FPE = fear of positive evaluation, RUM = rumination, SUP = suppression, ACC = acceptance, DEP = depression, COV = COVID-19 burden (VAS).

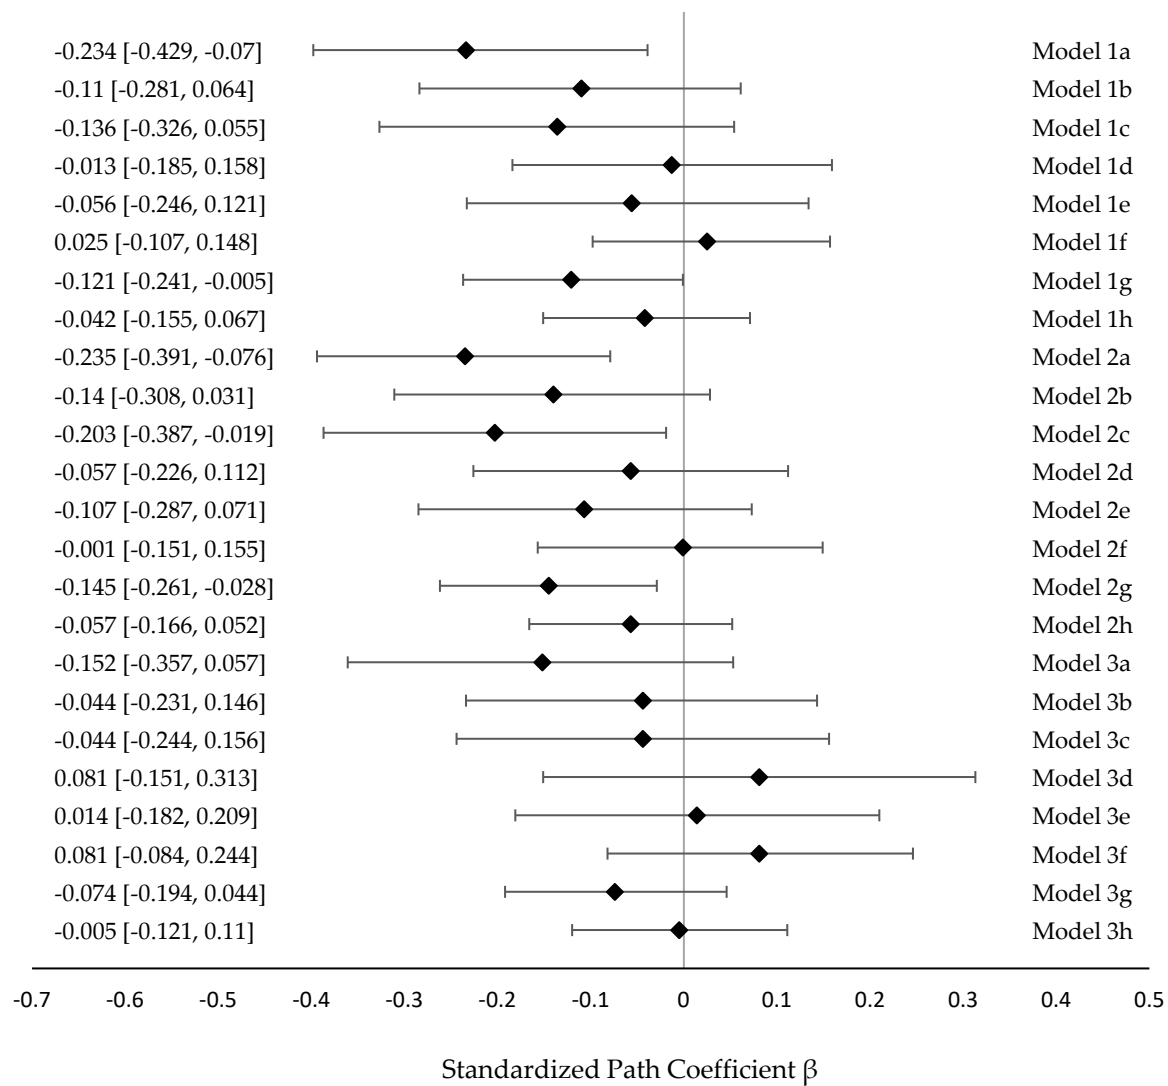

**Figure S1.** Coefficient Plot Displaying Standardized Coefficients of Direct Paths from all Calculated Models. Direct effect shown: Social anxiety  $\rightarrow$  suppression.

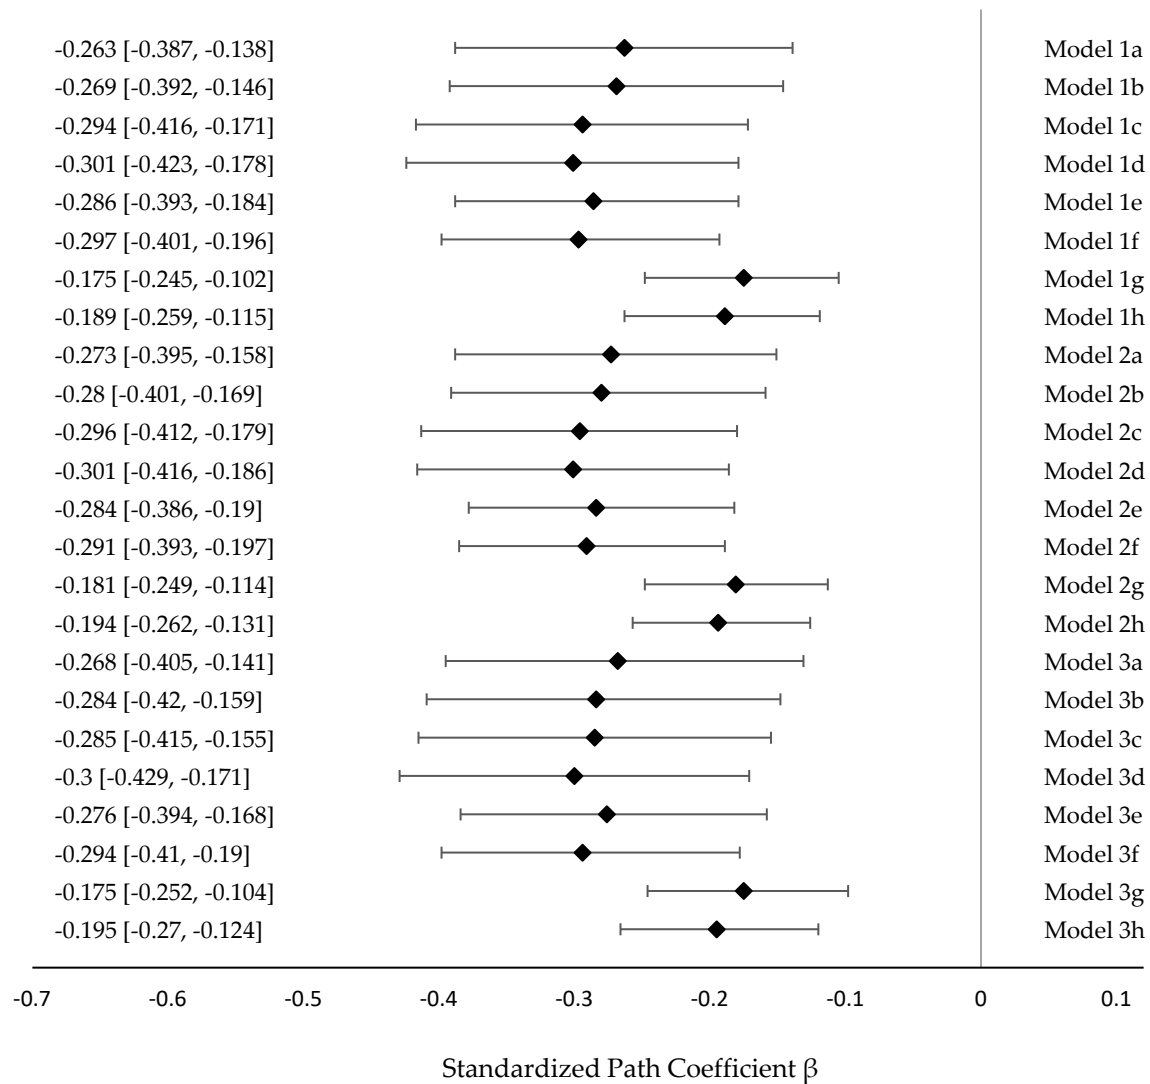

**Figure S2.** Coefficient Plot Displaying Standardized Coefficients of Indirect Paths from all Calculated Models. Indirect effect shown: Social anxiety  $\rightarrow$  FPE  $\rightarrow$  acceptance.

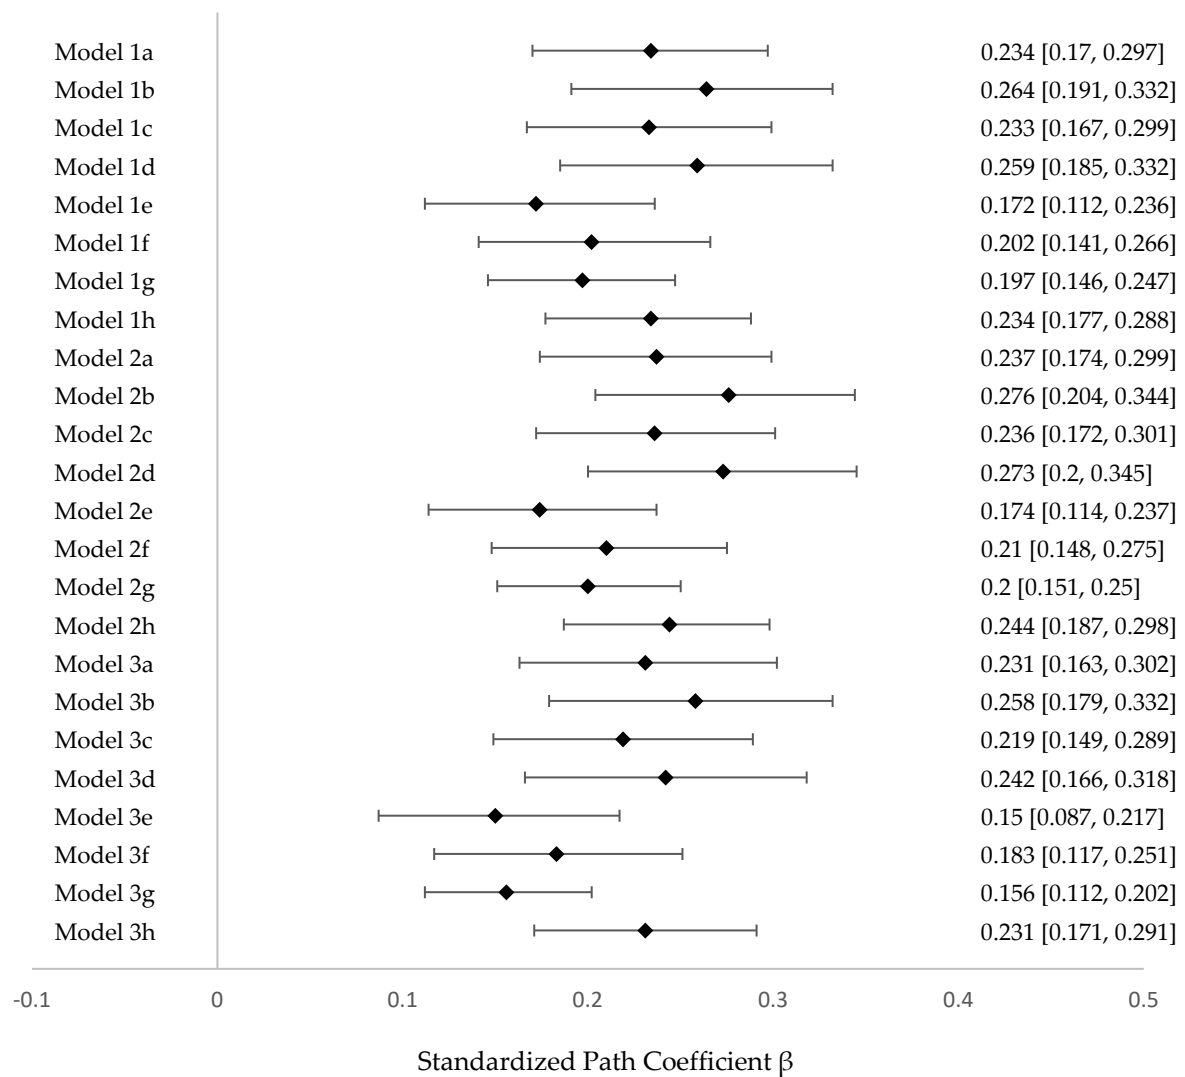

**Figure S3.** Coefficient Plot Displaying Standardized Coefficients of Indirect Paths from all Calculated Models. Indirect effect shown: Social anxiety → FNE → rumination.
